# Supplementary material
Source: Springer Nature journal article supplement (https://www.springermedizin.de/resource/supplementary/12937_2013_767_MOESM1_ESM.pdf/25654004)

**ADMINISTRATIVE UNIT****LEVEL OF CARE**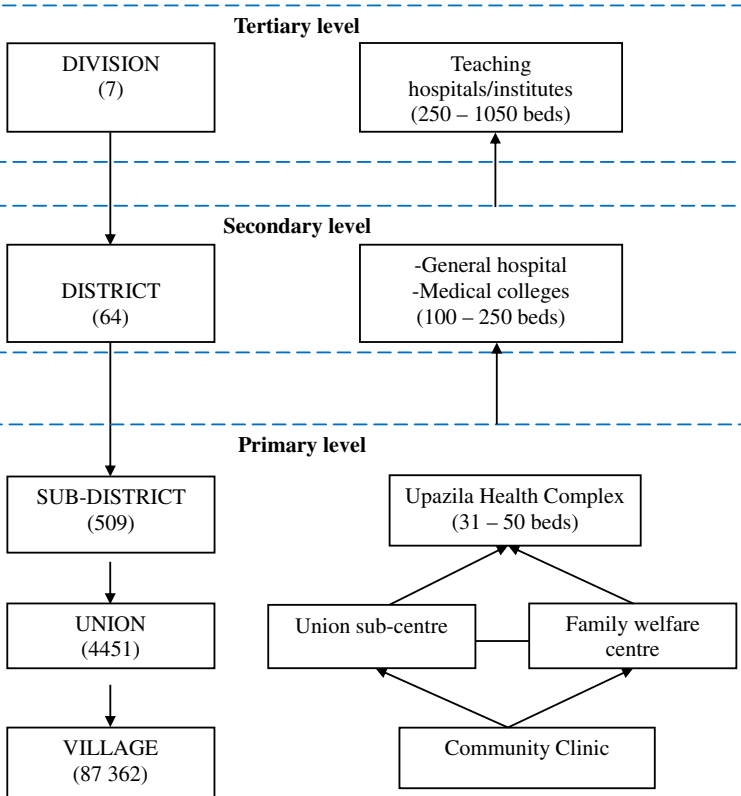

Supplement: MOESM1 [file 25654004]
